# Supplementary material for: Survival Follow-up and Mortality Prediction Model for Elderly Severe COVID-19 Patients following the complete relaxation of pandemic restrictions in China
Source: Research Square preprint supplement (doi:10.21203/rs.3.rs-6898119/v1), 2025-07-22
Supplement: Supplementary file 1 [file 704b432583d5837adc558d19.xlsx]

## Sheet: Sheet1
LASTDIE	TIME	LUNG	DOFC	AGE	FEMALE	TempX	MAPX	PX	RX	HTN	DM	COPD	AF	CTD	CA	SHOCK	ACS	CKD	WBCX	NX	LX	cTnI	NaX	CLX	KX	BUNX	CRX	DD	LAC	PHX	SPO2	OI	EI	HOSP	split_value
1	3	1	0	67	0	0.75	9	1	2	0	1	0	0	0	0	0	0	1	0.82	18.5	22.2	0	4.4	2.4	0.1	12.48	243.6	9.05	2.4	0.12	84.9	71	0	0	test
1	3	1	1	87	0	0.65	13	11	3	0	0	0	0	0	0	0	0	0	7.54	27.5	22.1	4.08	1.6	13.1	1.89	31.33	226	44.93	3.1	0.055	97.9	157.6	0	0	test
1	3	1	1	86	0	0.75	6	0	0	1	1	0	0	0	1	0	1	0	2.69	29.2	21.7	0.237	0.5	6	0.2	14.23	80.9	4.03	5.6	0.41	78	85.3	0	0	test
1	4	1	0	87	0	0.25	17	10	3	0	0	0	0	0	1	0	0	0	4.33	29.1	23.8	0.207	6.8	5.3	0.82	8.95	85.9	2.83	4.3	0.18	78	86.7	0	0	test
1	8	1	0	75	0	0.75	33	10	0	1	1	0	0	0	0	0	0	0	8.7	29.1	24.9	0.015	8	3.9	0.43	5.76	64.9	0.65	2.2	0.08	89	86.2	0	1	test
1	10	1	0	68	0	0.75	4	12	0	1	1	0	1	0	0	0	0	0	12.11	33.6	27.4	0.036	0.2	3.3	0.76	9.23	14.1	22.08	5.7	0.1	80.1	50.1	0	1	test
1	10	1	0	77	0	0.75	3	12	2	1	0	1	0	0	0	0	0	0	12.11	32.5	26.3	0.29	14	9	0.47	1.75	14.5	2.11	4.3	0.01	81.9	56.7	0	1	test
1	13	1	0	79	0	0.75	22	32	2	1	0	0	0	0	0	1	0	0	11.49	35.5	28.1	0.044	8.9	16.9	0.54	17.17	331.3	1.84	2.5	0.007	56	64.9	1	1	test
1	15	1	0	76	1	1.25	6	1	7	0	0	0	0	0	0	1	0	0	3.48	19.5	15.9	0.115	13.1	3.6	0.69	11.59	2.1	2.62	19.5	0.305	91	79.4	1	1	test
1	16	1	1	66	0	0.75	10	50	7	1	0	0	0	0	0	1	0	0	0.53	28.8	24.2	0.083	8.6	6.8	1.15	40.29	160.9	8.05	7.6	0.26	97.5	80	1	1	test
1	20	1	1	84	0	0.15	16	11	2	0	0	0	0	0	0	0	0	0	3.71	32	24.6	0	5.1	7.4	0.08	9.22	59.3	3.89	3.2	0.066	97.1	91.6	1	1	test
1	21	1	1	79	0	0.75	7	29	0	1	1	0	0	0	0	0	0	0	3.98	34.1	28	0.06	0.6	8.9	0.59	34.79	183	46.88	1.5	0.07	55.6	29.2	1	1	test
1	21	1	0	92	0	0.75	13	20	7	1	0	0	0	0	0	1	0	0	6.48	36.5	27.8	0.234	2.5	1.5	0.2	36.33	610.7	6.16	3	0.14	82.2	40.9	1	1	test
1	22	1	0	73	0	1.25	0	1	3	1	0	0	0	0	0	0	1	0	1.14	21.9	20.1	0.026	6	4.4	0.17	12.87	143	4.26	2.2	0.477	84.8	95.7	0	1	test
1	25	1	0	73	0	0.75	9	1	0	1	0	0	0	0	0	0	0	0	3.29	36.3	27.4	1.56	11.8	5.3	0.07	17.96	37	9.08	6.2	0.145	51	30.2	1	1	test
1	27	1	0	94	0	0.75	16	3	2	1	0	0	0	0	0	0	0	0	6.17	35.8	26.9	0.067	11.5	3.1	0.24	7.65	2.5	2.83	6.9	0.41	86.8	66.2	0	1	test
1	32	1	1	77	0	0.75	6	40	17	0	0	0	0	0	1	0	0	0	8.74	28.2	22.8	0.314	7	4.3	0.03	19.76	15.6	17.82	2.8	0.012	80.7	74.5	1	1	test
1	45	1	1	60	0	0.25	7	10	12	1	0	0	0	0	0	0	0	0	3.83	30.4	21.8	2.2	12.8	1.9	1.14	15.22	25	6.14	15.4	0.03	99.2	35.3	1	1	test
1	62	1	1	82	1	0.75	30	12	7	1	1	0	0	0	0	0	1	0	2.7	30.8	24.3	0.232	1.8	1.1	0.04	3.31	12.8	0.49	1.6	0.056	86.7	63.3	0	1	test
1	176	0	0	77	0	1.25	0	12	3	1	1	0	0	0	0	1	0	0	3.2	22.2	17.2	0.013	7	4.8	0.53	0.04	27	2.57	1.9	0.016	94.9	164.7	0	1	test
1	196	1	0	88	0	1.55	2	7	0	1	0	0	0	0	0	0	0	0	33.45	31.4	27.8	0.05	7	4	0.17	28.73	204.7	2.05	1.9	0.03	99.1	88	1	1	test
1	252	1	1	60	0	0.45	4	10	2	0	1	0	0	0	0	0	0	0	15.33	34.6	27.9	0.017	1.8	0.7	0.82	3.54	69.7	3.21	4.1	0.31	94.8	197.5	0	1	test
1	371	1	0	71	1	1.65	5	32	2	1	1	0	0	0	0	1	0	0	2.08	33.4	26.3	0.385	7.8	1.6	0.08	15.16	233.8	0.8	1.2	0.03	91	182.5	0	1	test
1	558	1	0	64	1	0.75	23	8	7	1	1	0	0	0	0	0	0	1	2.11	25.9	21.2	2.29	16.8	13.8	1.93	25.39	742	1.22	2.5	0.032	90	185.7	0	1	test
0	576	0	0	78	1	0.65	18	1	2	1	1	1	0	0	0	0	0	0	1.19	25.6	21.1	0	3.8	4.4	0.29	5	22.2	0.41	1.7	0.125	93.2	174.7	0	1	test
0	589	0	1	70	1	0.75	6	20	2	1	1	0	0	0	0	0	0	0	1.61	7.4	4.6	0	1.5	3.7	0.44	4.91	4.3	0.66	3.2	0.02	97.9	258.2	0	1	test
0	596	0	0	83	0	0.75	5	20	2	1	1	0	0	0	0	0	0	0	2.24	33.6	26.8	0.02	6.4	4.3	0.677	2.62	33.7	1.18	2	0.03	93	144.7	0	1	test
0	597	0	0	74	1	0.75	0	16	2	0	0	0	0	0	1	0	0	0	2.19	7.7	12.4	0	5.7	0.8	0.56	0.04	10.6	0.64	0.9	0.04	90.5	138.2	0	1	test
0	598	0	0	79	0	0.85	14	11	2	1	1	0	0	0	1	0	1	0	6.55	22	17.3	0.019	6.8	0.5	1.23	2.28	2	1.32	1.3	0.01	87	165.9	0	1	test
0	599	0	0	71	0	0.85	8	8	2	0	0	0	0	0	1	0	0	0	266.1	57.6	53.1	0	12.8	3	0.18	4.24	13.4	0.26	0.7	0.04	98.2	104.2	0	1	test
0	600	0	0	76	0	0.75	1	12	2	1	0	1	0	0	0	0	0	0	6.25	27.6	24.6	0.025	22.2	19.2	0.89	1.65	28.9	5.1	7.7	0.02	92.3	165.2	0	1	test
0	601	1	0	90	1	0.35	44	16	2	0	0	0	0	0	0	1	0	0	4.15	31.3	25.2	0	10.8	7.7	1.49	1.78	43.8	1.66	1.2	0.05	94.7	204.5	0	1	test
0	604	1	0	69	1	0.15	40	34	4	1	0	0	0	0	0	1	0	0	1.44	34.1	25.7	0.043	4	2.6	0.69	4.98	29.7	16.12	2.7	0.05	99.4	176.8	1	1	test
0	604	0	0	65	0	0.75	0	10	12	1	1	0	0	0	0	0	0	0	0.29	30.3	23.7	0.02	3.6	5.2	1.56	2.93	24.1	0.79	1.1	0.016	94.9	150.6	0	1	test
0	610	1	0	73	0	2.25	4	6	1	0	0	0	0	0	0	0	0	0	0.54	28.7	23.4	0.17	10.3	4.3	0.75	24.62	56.8	795	5.8	0.06	97.2	140	0	1	test
0	610	0	0	73	0	0.85	7	9	2	1	0	0	0	0	0	0	0	0	0.37	26.4	19	0.026	10.4	3	0.06	2.58	7.2	0.36	1.4	0.1	97	236.4	0	1	test
0	612	1	0	76	1	1.25	3	0	0	1	0	0	0	0	1	0	0	0	3.13	26.7	21	0.028	10.6	2	1.22	1.19	46.3	32.03	2	0.03	96.2	222.5	0	1	test
0	612	1	0	75	0	1.25	0	8	0	1	0	0	0	0	0	1	0	0	2.3	24	20.3	0	6.2	1.4	0.62	1.75	4.4	0.51	1.35	0.01	100	223.2	0	1	test
0	613	1	0	73	1	0.75	4	15	3	1	1	0	0	0	0	0	0	0	1.66	30.3	21.6	0.028	10.1	5	1.26	7.26	67.6	2.86	2.5	0.04	83	204.8	0	1	test
0	621	0	0	77	1	0.25	15	10	2	1	1	0	0	0	0	0	1	0	2.85	26.6	22.4	0.014	13.7	7.1	1.24	4.59	23	2.16	1.2	0.12	98.2	261.5	0	1	test
