# Supplementary material for: Survival Follow-up and Mortality Prediction Model for Elderly Severe COVID-19 Patients following the complete relaxation of pandemic restrictions in China
Source: Research Square preprint supplement (doi:10.21203/rs.3.rs-6898119/v1), 2025-07-22
Supplement: Supplementary file 2 [file a0dfb56f5a41d80522392f72.xlsx]

## Sheet: Sheet1
LASTDIE	TIME	LUNG	DOFC	AGE	FEMALE	TempX	MAPX	PX	RX	HTN	DM	COPD	AF	CTD	CA	SHOCK	ACS	CKD	WBCX	NX	LX	cTnI	NaX	CLX	KX	BUNX	CRX	DD	LAC	PHX	SPO2	OI	EI	HOSP
1	1	1	0	92	1	0.75	1	20	4	1	0	0	0	0	0	0	1	0	8.45	33	26.8	0.175	5.9	2.2	0.89	6.83	91.6	19.32	3.7	0.09	72.9	72.3	0	0
1	2	1	1	95	0	0.75	44	21	1	1	0	0	0	0	0	1	0	0	0.23	28.4	30	0	3.8	4.7	1.99	6.91	112.8	0.4	6.2	0.08	87.1	143.5	0	1
1	2	1	1	86	0	0.75	7	16	14	0	0	1	0	0	0	0	0	0	9.99	33.7	28.9	2.6	7.6	3.3	1.77	8.44	296.8	197.51	20	0.315	93.5	87.2	1	1
1	2	1	0	87	0	0.75	7	30	2	0	1	0	0	0	0	1	0	0	5.08	31.2	27.7	0.189	1.9	3.9	0.86	5.28	16.6	0.97	1.9	0.15	94.4	100.8	0	0
1	2	1	1	90	0	0.75	47	8	2	1	0	0	0	0	0	1	0	0	4.48	25.6	16.8	0.069	6	3.7	0.42	15.94	54.6	2.15	4.4	0.08	93.5	68.2	1	0
1	3	1	1	72	1	0.75	10	0	0	0	0	0	0	0	1	0	0	0	10.02	34.5	28.1	0.149	28	16	1.77	9.48	7	9.78	5.3	0	98.8	339	0	0
1	3	1	1	84	1	0.75	3	1	4	1	1	0	0	0	0	1	0	0	4.01	29.2	22.6	0.276	1.7	0.4	0.15	7.1	14.6	11.64	3.5	0.21	89	88.6	0	0
1	3	1	0	80	0	1.25	17	0	8	1	0	0	0	0	0	1	0	0	3.04	22.7	14.5	0.306	30.7	28.5	1.09	32.99	415	11.49	14.3	0.07	77.1	80	0	0
1	4	1	0	86	0	0.75	19	2	2	1	0	0	0	0	0	0	0	0	1.02	32.6	26.6	0.094	2	10.1	0.04	23.48	128.1	8.5	2.7	0	76.3	76	0	0
1	4	1	1	86	0	0.75	44	21	1	0	0	0	0	0	0	0	0	0	1.85	11.1	11.7	0	5.1	3	0.25	2.48	18.1	1.84	3.1	0.01	81.6	115.2	0	1
1	6	1	0	85	0	0.75	16	10	0	0	0	0	0	0	1	0	0	1	1.64	35.7	28.5	0.089	1	1	0.31	49.38	824	1.91	5.5	0.031	94.4	186.7	0	1
1	6	1	1	94	0	0.55	8	36	2	0	0	0	0	0	0	0	0	0	5.05	35.2	27.7	0	10.3	5.6	0.3	4.34	29.2	2.32	2.8	0.02	87.6	58.2	1	1
1	6	1	1	89	0	2.65	16	50	22	0	0	0	0	0	0	0	0	0	24.56	35.4	27.7	2.97	6.8	13	2.99	27.36	425.1	11.41	11.9	0.496	96.7	54.5	1	1
1	6	1	0	66	0	0.75	11	1	9	1	1	0	0	0	0	0	0	1	2.16	35.6	26.5	0.618	6.2	1.8	2.85	46.66	587.1	1.17	7	0.133	93.4	64.8	1	1
1	7	1	0	74	0	0.75	11	10	0	1	1	0	0	0	0	0	0	0	16.75	32.9	27.6	0.047	0.8	3.6	0.37	15.64	222	1.06	8.2	0.19	87.3	65.3	0	1
1	7	1	0	77	1	0.75	4	12	2	0	0	0	0	1	0	0	1	0	1.8	28.1	20.5	0.055	0.9	7.4	1.18	21.18	57.7	9.28	6.5	0.12	75.2	47.2	1	1
1	9	1	0	79	0	2.35	36	50	3	1	0	0	0	0	0	0	0	0	1.72	32.3	28.5	0.09	13.7	12	1.62	34.78	288.5	2.34	1.3	0.028	92.1	97.8	0	0
1	9	1	1	72	0	0.45	9	36	6	1	0	0	1	0	0	0	1	0	9.93	35.6	28.5	0.598	5.3	9	0.66	24.87	186.4	15.77	9.8	0.282	94.2	84.6	1	1
1	10	1	0	64	0	1.25	5	10	8	0	0	0	0	0	1	0	0	0	6.8	34.7	27.5	0.851	12.3	0.9	0.07	0.26	10.8	23.75	5.3	0.19	82.9	54.1	1	1
1	10	1	1	83	0	0.75	43	14	10	0	0	1	0	0	0	1	0	0	3.87	23.7	23.8	0.223	9.1	18	1.42	39.69	341.8	3.24	8.1	0.27	85.8	57	1	1
1	11	1	0	90	0	0.25	0	8	0	1	0	0	0	0	0	1	0	0	1.53	36.8	27.9	1.07	3.8	4.8	1.18	93.17	306.7	5.49	2.7	0.07	90	54	1	1
1	11	1	0	76	0	0.45	16	16	2	1	1	0	0	0	1	1	0	0	8.14	30.1	25.8	73.8	5.6	0.7	0.3	8.25	31.7	11.38	11.7	0.25	98	121.1	1	1
1	11	1	0	79	1	0.25	12	16	8	0	0	0	0	0	0	0	0	0	14.02	30.2	24.9	0	9.5	6.2	1.61	4.77	122	8.29	17	0.41	97.4	113	1	1
1	11	1	0	92	0	1.05	10	2	2	0	0	0	0	0	0	0	0	0	3.4	30.5	24.3	14.7	11.5	10.2	0.77	3.2	14.6	0.35	1.8	0.19	90.8	73.2	1	1
1	11	1	0	84	0	0.75	47	12	12	1	0	0	1	0	0	0	0	0	4.33	28.1	23.7	0.03	6.1	3.1	0.05	5.29	2.7	2.03	2.3	0.07	95	159.2	0	1
1	11	1	0	84	0	1.25	7	10	7	1	1	0	0	0	0	0	0	0	1.14	28.4	22	0.044	2.5	11.3	0.28	9.53	0.4	6.84	5	0.07	96	60.2	1	1
1	11	1	1	77	0	0.65	11	11	0	0	0	0	0	0	1	0	0	0	5.35	26	19.2	0.072	4.3	2	0.38	14.96	35.2	2.02	3.4	0.01	90.2	156.5	0	1
1	12	1	0	71	0	0.45	21	3	12	0	0	0	0	0	0	0	0	0	20.69	37.1	27.8	4.24	5.9	8.8	0.48	11.69	57.6	10.62	13.7	0.12	92.5	69	1	1
1	12	1	0	67	0	0.35	15	0	4	1	0	0	0	1	0	0	0	0	3.03	33.2	27.4	0	6.8	1.9	0.37	5.4	39.5	8.72	2	0.01	94	62	1	1
1	13	1	1	82	0	1.25	3	22	7	0	1	0	1	0	0	1	0	0	2.1	31.4	23.9	0.051	3.9	0.2	0.08	20.75	278.6	5.92	3.5	0.07	94.2	150.7	0	1
1	13	1	0	82	1	0.95	1	10	6	1	1	0	0	0	0	0	0	0	2.41	28.4	22.6	0.034	5.7	4.3	0.23	10.76	18	8.08	2	0.01	96	83.2	0	1
1	14	1	0	87	0	0.75	4	30	2	1	0	0	0	0	0	0	0	0	21.14	36.2	28.5	0.269	10	11.8	2.5	38.36	319.5	47.22	3.4	0.29	62.1	36	1	1
1	14	1	0	73	0	0.75	8	8	2	0	0	0	0	0	1	0	0	0	5.22	32.6	25.8	0.021	11.8	6.8	1.04	0.47	41.5	2.64	2.8	0.07	92.1	96	0	0
1	14	1	0	94	0	0.75	13	2	4	1	0	0	0	0	0	1	1	0	0.18	27.6	23.1	0.082	5.2	10	0.53	9.83	107	3	2.2	0.02	83.4	87.1	0	1
1	15	1	0	85	1	0.25	0	11	5	1	0	0	0	0	0	1	0	0	14.91	32.7	26.7	0	11.8	6.7	0.52	9.42	105.9	25.19	2.3	0.15	48.3	28.7	1	1
1	15	1	1	80	0	0.75	4	21	2	0	0	0	0	0	0	0	0	0	7.52	29.4	24.2	0.247	4.5	4.4	0.55	5.7	54	10.67	2.4	0.067	77	79.1	1	1
1	16	1	1	60	1	0.75	15	10	0	1	0	0	0	1	0	0	0	0	1.18	34.2	26.6	0.688	7.9	7.5	0.29	8.26	38.8	37.49	2.7	0.03	94.4	64.8	1	1
1	16	1	0	96	0	1.05	37	22	7	1	0	0	1	0	0	0	1	0	2.83	15.8	19.3	0	4.9	6.7	1.48	0.33	24.4	1.77	10.8	0.09	97	100	1	1
1	17	1	0	85	0	0.75	15	4	2	1	0	0	0	0	0	0	0	0	5.47	37.7	28.7	0.135	10.3	2.3	2.24	93.49	784.7	3.08	13.6	0.39	84	81.1	0	1
1	17	1	1	86	0	0.25	20	18	0	1	1	0	0	0	1	1	1	0	2.91	34.2	25.6	0.104	1.1	7.5	0.93	13.14	145	5.32	1.6	0.04	89	151.2	0	1
1	18	1	0	75	0	0.65	30	7	5	1	1	0	0	0	0	0	0	0	8.54	32.5	26.7	16.5	9.5	5.4	0.62	22.65	542.3	8.35	15	0.384	92	59.8	0	0
1	19	1	0	60	0	0.45	23	12	8	1	0	0	0	0	1	0	0	0	20.95	32.1	28.5	0.12	16.2	10.4	1.28	6.5	26.9	3.27	4.1	0.27	60	42	1	1
1	20	1	0	89	0	0.15	27	35	8	1	1	0	0	0	0	1	0	0	7.4	36.6	28.6	0.032	0.9	3.9	1.35	12.5	78	2.53	19	0.168	92	175	1	1
1	20	1	0	97	0	0.75	15	16	2	0	0	0	0	0	0	0	1	1	3.01	25.8	26.8	9.82	1.3	11.7	1.02	45.74	280	2.15	5	0.21	92.4	192	0	1
1	20	1	0	90	0	0.75	41	8	0	1	0	0	0	0	1	0	0	0	0.22	27.8	25.9	0.065	4.3	2.8	0.19	14.72	235.3	5.28	1.5	0.18	68	43	1	1
1	20	1	0	90	0	1.25	8	26	4	1	0	1	0	0	1	0	0	0	4.97	26.8	23.7	0	3.7	0.8	0.23	4.17	30.4	1.35	4.2	0.141	95.4	74.4	0	1
1	22	1	0	85	1	1.05	4	10	13	1	1	0	0	0	1	0	0	0	31.05	30.1	27	0.347	16.6	6.6	0.62	3.22	18.2	12.23	3.1	0	78	46.6	0	1
1	22	1	0	91	0	0.75	6	30	2	1	0	1	1	0	0	0	0	0	2.62	31.5	26.6	0.151	2.1	2.1	0.08	13.71	115	19.12	0	0.03	97.9	253.7	0	1
1	22	1	0	66	0	0.75	2	23	7	0	0	0	0	0	1	0	0	0	7.02	32.4	26.3	0	16.6	6.3	0.58	1.23	44	12.97	4.1	0.006	89.5	95	0	1
1	23	1	1	90	0	0.75	20	3	6	1	1	0	0	0	0	0	0	0	2.6	19.3	20.9	0.114	6	6.1	0.12	12.83	88.4	2.02	2.7	0.26	74.8	40.6	1	1
1	24	1	0	84	0	0.65	17	12	7	1	0	0	0	0	0	0	1	0	10.19	35.8	27.6	0.283	2.6	3.3	0.3	18.72	105	7.64	4.2	0.33	42.7	29	1	1
1	25	1	1	82	0	0.75	8	2	2	0	0	0	0	0	0	0	0	0	8.18	36.8	29	0.157	3.9	0.2	0.26	4.4	26.8	13.28	2.2	0.03	84.8	86.1	1	1
1	25	1	0	74	0	0.75	22	10	2	1	0	1	0	0	0	0	0	0	4.78	32	27.2	0.026	2.8	3.9	0.27	14.42	288.8	26.48	1.4	0.013	98	109.9	1	1
1	26	1	0	83	0	0.75	35	7	0	1	0	0	0	0	0	0	1	0	6.07	33.4	25.7	0.392	8.6	0.5	0.69	5.28	19.9	98.8	3.8	0.301	59.3	39.8	1	1
1	28	1	1	67	0	1.05	0	1	2	0	1	0	0	0	0	0	0	0	3.32	36.3	27.7	0.627	0.7	1.4	0.23	20.93	109.2	7.61	11.6	0.177	66.6	44.1	1	1
1	28	1	1	83	0	2.05	22	12	7	1	1	0	1	0	0	0	1	1	2.55	33.5	25.8	0.217	6.1	2.5	0.13	15.3	207.9	5.63	8.1	0.179	93.1	73.6	1	1
1	29	1	0	74	0	0.75	40	0	7	0	0	1	0	0	0	0	0	0	9.05	35.5	28.2	0.027	16	15.5	0.1	6.53	38.2	0.8	5.3	0.18	96	95	1	1
1	29	1	1	87	1	1.15	6	3	2	0	0	0	1	1	0	1	0	0	0.7	30.8	26.1	0.211	8.7	1.9	0.5	19.58	0	6.98	2.7	0.019	88.9	68.8	0	1
1	31	1	1	85	0	0.75	39	2	13	1	1	0	0	0	1	0	0	0	12.26	34.3	28.6	0.066	3.7	9.4	0.57	38.88	220.1	11.09	1.8	0.21	84	60	1	1
1	35	1	0	69	0	0.45	11	5	5	1	1	0	0	0	0	0	0	0	4.5	36.6	28.4	0	13.6	7.9	0.06	0.99	18	32.9	2	0.047	91	62.4	1	1
1	35	1	0	92	0	0.85	9	34	0	1	0	0	0	0	1	0	1	0	3.81	22.5	20.6	0.031	13.3	10.8	1.14	6.05	21.3	34.53	1.2	0.03	97.8	87	1	1
1	37	1	1	81	0	0.75	1	1	0	1	1	0	0	0	0	0	1	0	0.73	26.4	23.3	1.81	3	4	0.3	11.66	38.2	8.3	3.1	0.03	96.3	67	1	1
1	38	1	0	67	1	0.75	25	55	7	1	0	1	0	1	0	0	0	0	3.85	33.8	28	0.0336	15.2	21.4	0.31	0.75	49.2	1.94	3	0.093	67.4	42.3	1	1
1	39	1	0	60	1	0.45	1	16	2	1	0	0	0	1	1	0	0	0	21.84	37.8	28.3	0.058	1.3	7	0.62	8.04	60.3	9.8	19	0.317	92.4	73.1	1	1
1	41	1	1	78	0	0.75	1	15	11	1	1	0	1	0	0	1	0	0	1.67	33.3	24.5	0.063	8.2	0	0.52	20.29	59.2	3.48	14.5	0.12	97.3	84	1	1
1	45	1	0	60	0	0.75	0	12	2	1	0	0	0	0	0	0	0	1	6.76	26.7	25.4	0.435	11.1	4.9	0.45	25.29	894.1	2.24	1.8	0.053	97.2	94	1	1
1	46	1	0	60	0	0.55	8	21	1	0	0	0	0	0	0	0	0	0	2.98	33.2	25.5	0	11.7	18.8	0.27	10.81	19.7	4.52	3.4	0.166	77.1	50.4	1	1
1	52	1	0	95	0	0.95	1	4	1	1	0	0	0	0	0	0	0	0	2.61	14	15.4	0.077	5.8	0.8	0.56	7.32	40.3	2.03	2.9	0.07	86	112.5	0	1
1	55	1	0	81	0	0.75	11	12	4	0	0	0	0	0	1	0	0	0	0.22	25.7	22	0	9.2	6.4	0.43	3.61	11	2.81	1.5	0.06	83.8	84.5	0	1
1	56	1	0	73	1	0.45	10	8	5	1	1	0	1	0	0	0	0	1	6.72	37.8	29.7	2.47	7.5	3.1	0.17	31.77	674	2.34	2	0.21	90.7	65.2	0	1
1	61	1	0	82	0	0.75	31	8	2	1	1	1	0	0	0	0	0	1	2.21	26.1	24.4	8.02	4.5	5.4	1.15	16.13	419.5	8.26	1.5	0.07	96.6	203.7	0	1
1	62	1	1	69	0	0.05	12	45	22	1	1	0	0	0	0	1	0	0	15.86	35.8	27.9	0.11	6.9	5.2	0.83	33.29	838.8	32.4	4.8	0.094	90.7	61.4	1	1
1	86	1	0	87	0	0.05	21	10	3	1	1	0	0	0	0	0	1	0	2.59	29	23.3	32.49	6.3	3.7	0.5	4.48	60.1	5.89	5	0.09	92.5	76.2	0	1
1	92	1	0	76	0	0.75	3	18	2	1	0	0	0	0	0	1	0	0	0.49	30.9	24.4	0.72	2.2	2.3	0.07	2.25	22.6	7.91	8.1	0.19	87	51.6	0	1
1	110	1	0	80	1	0.75	15	6	0	1	1	0	0	0	0	0	0	0	0.02	35.9	28.2	0.127	11	6.8	0.73	5.58	11.5	1.19	1.78	0.035	92.5	84.3	0	1
1	110	1	0	93	1	1.45	13	21	4	0	0	0	0	0	0	1	0	0	3.39	17	15.9	0.026	3.3	1.6	1.28	3.81	35.2	3.21	1.6	0.04	99	361.7	0	1
1	111	1	1	63	1	0.75	3	18	3	0	1	0	0	0	0	0	0	0	3.4	31.7	25.6	5.28	4	0	0.66	7.01	1	2.91	2.6	0.02	79.6	42.5	1	1
1	111	1	0	60	0	0.45	4	12	2	1	0	0	0	0	1	1	0	0	5.68	21.4	18.3	0	13.9	16.5	0.14	2.1	19.1	3.56	0.9	0.03	99.7	151.2	0	1
1	128	1	0	81	0	0.25	21	33	0	1	1	0	0	0	1	0	0	0	3.47	30.7	26.2	0.05	8	1.3	0.08	3.6	8.8	6.03	1.9	0.05	96.4	91.2	0	1
1	130	1	0	68	1	0.45	26	39	2	0	0	0	0	0	0	0	0	0	10.22	33.3	26.2	0.093	5.1	2.5	0.51	4.08	21.8	1.63	3.4	0.03	68.6	33.5	1	1
1	160	1	0	80	0	0.55	6	12	1	0	0	0	1	0	0	0	1	0	1.58	32.9	26.2	0.025	4.6	1.8	0.55	5.12	11.5	1.29	1.3	0.077	99.2	184.3	0	1
1	170	1	1	80	0	1.25	13	8	0	0	1	0	0	0	0	1	0	0	0.44	24.4	18.7	0.026	5.1	1.9	0.22	2.42	27.3	1.54	2	0.05	93.3	157.5	0	1
1	180	1	1	60	0	0.75	5	30	0	0	0	0	0	1	0	0	0	0	8.65	29.6	24.4	0	2.6	3.3	0.61	0.82	63.3	1.38	2.2	0.021	96.3	75.2	1	1
1	240	1	0	68	0	0.95	2	37	4	0	0	0	0	0	0	1	0	0	7.83	32.2	25.1	0	16.3	10.7	0.37	21.16	39.6	0.95	1.5	0.094	98.7	147.4	1	1
1	257	0	1	60	0	1.25	8	20	2	0	0	0	0	1	0	0	0	0	2.69	28.3	25	0	3.7	1.4	0.67	0.19	57	2.17	0.9	0.005	97.2	118.1	1	1
1	300	1	0	70	0	1.25	20	0	7	1	0	1	0	0	0	1	0	0	2.82	15.7	11.7	0.037	9.5	7.6	0.74	4.65	4.4	0.56	1.3	0.02	86	167.5	0	1
1	328	1	0	71	1	1.35	1	10	0	0	0	0	0	0	1	0	0	0	6.5	14.4	20.4	0.026	4.3	9	0.12	6.42	24.8	1.46	0	0.02	98	256.5	0	0
1	329	0	0	65	0	0.75	9	1	0	1	1	0	0	0	0	1	0	0	2.17	34.5	26.8	0.869	4.4	1.9	0.54	5.7	72.9	1.43	1.2	0.016	97	102	0	1
1	379	1	0	87	1	0.75	32	10	2	1	1	0	0	0	0	0	0	0	5.23	23.5	19.4	5.91	3.7	1.7	0.5	5.59	3	0.5	3.7	0.156	94.3	127.8	0	1
1	416	1	0	91	0	1.35	2	25	4	1	0	0	1	0	0	1	1	0	0.5	16.1	16.6	4.22	2	5	0.9	8.38	72.9	3.95	3.9	0.01	88.8	146.5	0	1
1	461	1	0	74	1	0.45	16	10	2	0	0	0	1	1	0	0	0	0	0.02	13	10.8	0.079	2.3	5	0.8	3.01	16.8	4.56	3.3	0.04	96.3	183.5	0	1
1	502	1	0	95	0	0.65	17	12	7	1	0	0	0	0	0	1	0	0	2	2.9	17.1	0.052	3.5	2.6	0.35	3.08	12.1	1.33	2.1	0.04	96.3	192.5	0	1
1	507	0	0	74	1	1.75	15	15	3	0	0	0	0	0	0	0	0	0	4.19	19.8	19.4	0.161	4.6	1.1	0.25	4.27	24.9	0.97	3.8	0.21	98.8	139.3	1	1
1	539	0	0	84	0	0.55	3	5	4	1	1	0	0	0	0	1	0	0	1.25	33.5	26.3	0.032	6.9	4.3	0.51	8.76	36.7	13.42	2.8	0.03	90	72	0	1
1	552	0	0	70	0	0.75	3	4	4	0	0	0	0	0	0	0	0	0	1.56	37.1	27.4	0	15	18.8	0.24	1.39	42.4	3.55	1.5	0.05	96.1	93.6	0	1
0	588	1	0	67	1	0.75	23	6	2	1	0	0	0	0	1	0	0	0	0.2	29	20.2	0	4	1.1	0.89	4.04	24.9	10.54	4.6	0.05	97.4	224.9	0	1
0	591	0	0	71	1	0.75	2	53	0	0	1	1	0	0	0	0	0	0	17.2	33	27.6	0.165	4.2	0.4	0.5	1.09	30.1	7.88	2.9	0.01	90.2	143.7	1	1
0	591	0	0	77	0	0.95	13	2	9	0	0	0	0	1	0	0	0	0	5.62	29.4	21.9	2.3	12.2	6	0.26	3.98	2.4	0.86	2.1	0.006	97	198.6	0	1
0	591	0	0	65	1	0.75	16	6	3	1	1	0	0	0	1	0	0	0	1.55	33.5	39.9	0	1.3	0.9	0.41	5.54	15	0.62	2	0.05	97	115.6	0	1
0	592	0	0	78	1	1.75	7	39	2	0	0	0	0	0	1	0	0	0	0.5	28.4	24.1	0.036	12.3	11.6	0.7	0.72	52.3	5.44	2.5	0.07	84.9	121.2	0	1
0	593	0	0	62	0	1.05	8	12	2	1	1	0	0	0	0	1	0	0	0.45	27.1	18.8	0	10.4	7	0.65	6.11	28.4	1.45	3.8	0.028	89.8	208.8	0	1
0	594	0	0	60	1	0.55	14	5	2	1	1	0	0	0	0	0	0	1	3.87	26.9	24.4	0	9.7	2.4	0.19	0.65	19	2.97	1.5	0.03	95.2	169	0	1
0	595	1	0	60	1	0.75	12	30	1	0	0	0	0	0	0	0	0	0	4.15	3.2	0.7	0	3.7	1	0.57	0.36	13	0.26	2	0.05	94.5	164.5	0	1
0	597	1	0	82	1	0.55	10	18	2	1	1	0	0	0	0	0	0	0	4.53	33.4	27.9	0.021	11.8	2	0.43	3.73	53.4	3.33	1	0.04	94.1	66.6	0	1
0	597	0	0	69	1	0.45	6	10	4	1	0	0	0	0	0	0	0	1	12.27	19.1	24.3	0.016	29.8	21.8	0.45	27.39	234.8	0.89	0	0.02	89	185.5	0	1
0	597	1	0	75	0	0.75	8	0	4	0	1	1	0	0	0	1	0	0	2.8	26.7	23.3	53.55	2.2	3.2	0.57	2.7	0.7	1.62	1.5	0.047	97.9	197.7	0	1
0	598	0	0	81	0	0.65	0	2	4	1	1	1	0	0	0	1	0	0	3.53	33.7	25.4	0.026	8	13.4	0.58	22.88	139.9	23.4	2	0.03	94.2	83.7	0	1
0	598	1	0	70	1	0.75	23	6	2	1	1	0	0	0	0	0	0	1	1.35	28.5	25	0.085	3.1	10.5	0.32	12.46	130.5	28.9	1.2	0.09	93.2	124.2	0	1
0	598	0	0	80	1	0.75	17	19	2	1	1	0	0	0	0	1	0	1	4.45	25.9	21.3	0.022	4.2	5.7	0.29	0.94	42.1	2.22	0	0.03	88	186.7	0	1
0	600	0	0	70	0	0.55	8	9	3	1	0	0	0	0	0	1	0	0	0.8	23.5	20.4	0.026	4	0	0.37	4.83	28.4	1.25	1.6	0.01	95	215.2	0	1
0	602	1	0	75	0	0.95	7	16	2	1	0	0	0	0	0	0	0	0	0.06	22.6	22.8	0	5.5	5.2	0.33	3.99	25.2	0.46	1.9	0.01	98.2	282	0	1
0	602	1	0	89	1	0.85	6	14	2	1	1	0	0	0	0	1	0	0	3.59	27.2	22.7	0.019	15.9	7.8	0.63	6.01	25.3	0.65	2.1	0.01	95.4	121.6	0	1
0	602	0	0	83	0	0.75	7	12	2	1	0	1	0	0	0	0	0	0	4.54	25.9	20	0.023	7.2	14.5	0.48	2.92	21	0.44	2.2	0.12	95	195.7	0	1
0	603	0	0	83	0	0.65	18	10	3	0	0	0	0	0	0	0	1	0	2.52	26.3	23.7	0.02	7.5	2.6	0.35	0.31	1	1.69	1.1	0.01	88	224.6	0	1
0	603	0	0	84	0	0.75	6	15	2	0	0	0	0	0	0	0	0	0	0.95	15.4	10.1	0.039	7.1	1.3	0.18	5.57	14	0.85	2.6	0.09	86	175.8	0	1
0	603	1	0	65	1	1.05	9	24	3	1	0	0	0	0	0	0	1	0	5.06	6	3	0.013	4.6	7.6	0.69	2.29	35.6	0.44	1.1	0.09	98.7	179.8	0	1
0	604	0	0	87	1	0.75	19	0	3	0	0	0	0	0	0	1	0	0	0.2	19.7	18.6	0.084	12.6	13.3	0.94	1.12	37.8	0.65	2	0.04	94.3	181.7	0	1
0	604	0	1	84	0	0.25	22	4	7	1	1	0	0	0	0	1	1	0	1.5	15.6	12.8	0.019	10	6.5	0.68	2.29	14.5	7.84	2.3	0.02	81.8	141.7	0	1
0	605	0	0	85	0	2.95	1	12	3	1	0	0	0	0	0	1	0	0	1.2	34.7	26	0.155	9.5	2	0.59	5.42	18.1	3.43	1.7	0.021	95.1	211	1	1
0	605	0	0	72	0	0.45	9	10	4	1	1	0	0	0	0	0	0	1	0.25	24.4	22	0	8.7	2.2	0.65	15.25	64	1.27	4	0.17	97.1	233.2	0	1
0	606	0	0	78	0	1.25	3	11	2	1	0	0	0	0	1	0	0	0	2.21	18.8	18.3	0	11	5.4	0.14	0.47	35.4	0.79	2.2	0.01	93.9	211.5	0	1
0	606	1	0	64	1	0.05	3	12	0	0	0	0	0	0	0	0	0	0	1.25	9.6	5.8	0	2.9	5	0.69	1.57	43.7	2.63	1.6	0.05	97.1	129	0	1
0	607	1	0	89	0	0.35	4	2	4	1	0	1	0	0	0	0	0	0	5.38	29.3	26	0.301	24.5	10.6	0.46	3.97	2.4	1.06	3.4	0.01	88	179	0	1
0	607	1	0	71	0	0.35	3	10	0	0	0	0	0	0	0	1	0	0	4.43	26.3	21.1	0.018	3.9	3.2	1.62	0.71	32.6	16.16	2.2	0.1	86.4	89.6	1	1
0	607	0	0	64	0	0.45	2	6	0	1	0	0	0	0	0	0	0	0	2.02	16.9	16.5	0	8.1	4.1	0.6	0.66	2.2	1.04	1.8	0.02	96	166.5	0	1
0	607	1	0	85	0	0.75	0	11	2	1	0	0	0	0	0	1	0	0	6.02	20.9	12.7	0.033	9.3	2.9	0.71	0.12	8.6	2.36	1.3	0.09	90	157.6	0	1
0	608	1	1	60	1	0.75	4	9	4	1	1	0	0	0	0	0	0	1	4.88	26.2	23.8	1.93	21	5.4	0.04	28.4	1375.3	5.72	3.4	0.12	83.9	160.1	0	1
0	608	1	0	72	1	0.75	21	20	1	0	0	1	0	0	0	0	1	0	9.6	21.4	22.3	0.11	12.2	23.5	0.74	8.63	93.2	1.84	2.7	0.16	89.6	200	0	1
0	608	1	0	64	0	0.45	36	12	2	0	0	0	0	0	0	0	0	0	3.47	26.8	21	0.076	8	1.7	1.02	25.32	444.4	1.35	1.1	0.041	99.8	451.7	0	1
0	608	1	0	84	0	0.75	27	0	0	1	1	1	0	0	0	0	0	0	0.12	19.7	18	0	7	0.8	0.01	3.73	5.6	0.33	2.6	0	97.6	241	0	1
0	608	1	0	69	0	0.75	22	8	0	1	1	0	0	0	0	1	0	0	1.2	16.6	15.1	0.021	3.4	0.9	0.39	1.61	2.4	0.52	1.7	0.02	96.3	196.5	0	1
0	608	1	0	60	0	0.75	34	11	3	0	0	0	0	0	0	0	0	0	0.54	14	10.3	4.19	8.2	1	0.59	4.01	73.5	0.83	2.1	0.03	96.7	129	0	1
0	609	1	0	73	1	1.05	3	12	2	1	0	0	0	0	0	0	0	0	7.08	30.3	27.7	0.674	4.6	6.1	0.42	7.76	429.1	0.82	1.6	0.014	90	206.5	0	1
0	610	1	0	91	1	0.75	8	10	0	1	1	0	0	0	0	0	0	0	2.33	22	17	0.44	6.9	6.3	0.03	1.94	5	0.5	1.4	0.02	94.1	171	0	1
0	610	0	0	81	1	0.75	1	3	0	0	0	0	0	0	0	0	1	0	4.78	13.7	12.8	0	10.1	4.3	0.69	1.06	48.5	0.74	1.1	0.05	94	185.5	0	1
0	611	0	0	74	0	2.65	2	36	8	0	0	0	0	0	0	0	0	0	3.17	28.3	25.7	0	7.6	3	0.7	1.63	126.9	13.9	1.9	0.02	95.4	139.3	0	1
0	611	0	0	88	0	2.05	13	49	0	0	1	0	0	0	0	0	0	0	4.52	25	25	0.015	1.6	6.6	0.77	0.14	3.7	1.34	1.5	0.03	97.2	221.7	0	1
0	611	1	0	88	0	1.65	74	2	13	0	0	0	0	0	0	0	0	0	1.39	26.5	21.7	0.162	10	3.9	0.13	11.54	10	9.27	4	0.01	88	128.2	0	1
0	611	1	0	86	0	0.35	31	15	8	0	0	0	0	0	0	0	0	0	2.13	22.2	21.1	0.074	3.3	4.2	0.07	0.82	11.8	1.86	1.6	0	87	189.5	0	0
0	611	1	0	80	1	0.95	4	10	1	0	0	1	0	0	0	0	0	0	10.87	22.7	20.6	0.025	15.7	14	0.31	3.12	5	1.16	1.1	0.03	89.8	168.7	0	1
0	611	1	1	60	1	0.15	4	4	2	0	0	0	0	0	0	0	0	0	1.92	16.3	14.2	0	24	14.6	0.42	0.15	46.7	4.85	1.35	0.03	89	184.6	0	1
0	611	1	0	63	0	0.75	13	10	0	1	0	0	0	0	0	1	0	0	0.17	8.3	7	0	5.9	0.9	0.48	1.73	30.4	0.5	1.5	0.02	97.1	202.5	0	1
0	612	1	0	78	0	1.25	3	10	2	0	0	0	0	0	1	0	0	0	4.17	11.3	11.2	0.026	19.6	10.3	0.15	0.78	35.7	0.81	1.2	0.07	98	237.5	0	1
0	612	1	0	77	1	0.75	0	12	6	1	0	0	0	0	0	0	1	0	1.02	0	2.6	0.027	13.1	12.5	1.23	3.19	42	0.99	2.4	0.04	89.5	154.2	0	1
0	613	0	0	71	1	1.55	23	88	16	0	1	0	0	0	0	0	1	0	3.8	32.8	25.9	0.141	7.2	3.2	0.99	3.45	20.2	2.91	3.2	0.01	96.3	85.3	0	1
0	613	0	0	71	0	2.35	11	16	4	0	0	0	0	0	0	0	0	0	3.35	30.7	23.6	0.016	12.1	7.4	0.27	2.01	6.3	2.99	1.3	0.12	96	175	0	1
0	613	1	1	60	0	0.75	13	0	0	0	0	0	0	0	0	0	0	0	4.38	26.9	21.2	0	5.1	1.9	0.24	0.54	18	0.44	2.5	0.038	92.9	134.2	0	1
0	613	0	0	82	0	0.25	5	8	3	0	0	0	0	0	0	1	0	0	1.82	26.3	20.4	0.155	6.5	6.7	0.14	12.01	45.1	0.34	1.8	0.03	89	153	0	1
0	613	1	0	86	0	1.45	6	20	2	0	0	0	0	0	0	0	0	0	0.07	21.6	20	0	5.6	1.5	0.44	4.42	18.6	25.37	0.7	0.07	99	265	0	1
0	613	1	0	68	0	1.25	7	7	2	0	1	0	0	0	1	0	0	0	1.41	20.1	19.2	0	7.4	4.1	0.4	1.21	21.5	0.33	1.1	0.01	96.5	198.5	0	1
0	613	0	0	76	0	0.45	17	8	0	1	0	0	0	0	0	0	0	0	4.95	17.5	15.8	0	8.5	4.2	0.19	3.68	19.3	0.46	1.25	0.05	89	225.4	0	1
0	614	1	0	60	1	2.05	20	11	2	1	0	0	0	0	0	1	0	0	14.71	16.3	18.9	0.05	10.9	7	0.93	1.89	16.5	7.99	4.3	0.12	66.6	85.1	1	1
0	614	1	0	60	1	1.75	10	30	7	1	0	0	0	0	1	0	0	0	4.17	13	18.6	0.017	6.2	0.8	0.46	1.51	31	8.21	1.2	0.072	99.2	226.5	0	1
0	614	1	0	74	0	1.25	8	12	2	0	0	0	0	0	0	0	0	0	6.77	20.7	17.4	0	8.8	2.8	0.87	0.45	38.5	0.39	0.9	0.03	89	228.5	0	0
0	614	1	0	69	0	1.75	23	0	3	1	1	0	0	0	0	1	0	0	3.46	13	15.4	0.015	4.6	1	0.83	1.71	23	0.31	1.2	0.05	86	224.2	0	1
0	615	1	1	72	1	0.45	2	8	4	1	0	0	0	0	0	0	0	0	3.76	33.1	26.8	0	6.8	13.4	0.73	1.71	20.7	1.83	1.2	0.165	93	178.8	0	1
0	615	0	0	86	1	1.25	8	10	2	1	0	0	0	0	0	1	0	0	0.09	11.7	10.4	0.018	6.7	0.3	0.49	0.59	41.6	0.42	2.3	0.08	88	176.5	0	1
0	618	0	0	66	1	0.25	0	0	1	0	1	1	0	0	0	0	0	0	1.43	28.4	20	0.014	2.1	12.3	1.25	3.59	16.2	0.44	3	0.02	98.4	157	0	1
0	626	1	0	72	0	0.75	4	7	1	1	0	0	0	0	0	1	0	1	1.35	33.8	27.1	0.04	0	2	1.15	0.27	23	2.25	9	0.03	99	140	0	1
