# Supplementary material for: Survival Follow-up and Mortality Prediction Model for Elderly Severe COVID-19 Patients following the complete relaxation of pandemic restrictions in China
Source: Research Square preprint supplement (doi:10.21203/rs.3.rs-6898119/v1), 2025-07-22
Supplement: Supplementary file 3 [file b77822101385610c23ae257e.docx]

**Clinical Research Telephone Follow-up Form for Elderly Patients with Severe COVID-19**

Study ID: __________
Patient Name: __________
Follow-up Date: __/__/____
Follow-up Staff: ______
Follow-up Method: ☐ Direct contact with patient ☐ Response by family member ☐ Other ______

**Ⅰ. Confirmation of Basic Information**

1. Patient's date of birth: ____/__/__
2. Hospital Admission Record No./ID: __________
3. Date of first COVID-19 diagnosis: ____/__/____
4. Previous ICU admission: ☐ Yes ☐ No

**Ⅱ. Survival status (single choice)**

☐ 1. Survival
☐ 2. Death (Proceed to Section 3)
☐ 3. Lost to follow-up (Terminate follow-up, record reason: ________________)
☐ 4. Refusal to continue participation (Terminate follow-up)

**Ⅲ. Death Information (to be completed only in case of patient death)**

1. Date of death: ____/__/__

Provide the translation result directly, as follows: (If uncertain, record: □ Only the month ______Year__Month; □ Only the year ______Year)

2. Place of death: ☐ Home ☐ Emergency department ☐ Inpatient ward ☐ ICU ☐ Nursing home ☐ Other_________

3. Immediate cause of death (as described by family members):

4. Whether related to COVID-19:
□ Directly died from acute COVID-19 infection (e.g., respiratory failure)
□ Died from post-COVID sequelae (e.g., pulmonary fibrosis, myocardial injury)
□ Died from exacerbation of underlying diseases (e.g., heart failure, renal failure)
□ Other infections (e.g., bacterial pneumonia, urinary tract infection)
□ Non-infectious causes (e.g., stroke, myocardial infarction, accidents)
□ Unknown cause

5. Major symptoms within 1 month before death (multiple selections allowed):

□ Dyspnea □ Persistent cough □ Fatigue □ Fever □ Impaired consciousness □ Chest pain □ Lower limb edema □ Severe anorexia □ Other_________

**IV. Functional Status Assessment (if alive)**

1.Activities of Daily Living (ADL score):

| Project | Full self-care | Partial assistance is required | Completely rely on |
| --- | --- | --- | --- |
| Food intake | ☐ | ☐ | ☐ |
| Use the toilet | ☐ | ☐ | ☐ |
| Dressing | ☐ | ☐ | ☐ |
| Walking/Moving | ☐ | ☐ | ☐ |

1. Whether long-term oxygen therapy is required: ☐ Yes ☐ No

**V. Important Notes**

Family member's emotional state: ☐ Calm ☐ Sad ☐ Resistant ☐ Other______

Data Reliability Assessment: ☐ Reliable ☐ Partially questionable (Note: __________)

Further verification is required for the following content: ________________________

**Follow-up staff statement:**

The participants were informed of the research purpose and assured that the information would be used solely for scientific purposes. They provided informed consent to participate in the study.

Signature: __________ Date: ____/____/____
