# Supplementary material for: Survival Follow-up and Mortality Prediction Model for Elderly Severe COVID-19 Patients following the complete relaxation of pandemic restrictions in China
Source: Research Square preprint supplement (doi:10.21203/rs.3.rs-6898119/v1), 2025-07-22
Supplement: Supplementary file 4 [file e19c85ae59afe04d1996c041.xlsx]

## Sheet: Sheet1
Outpatient number	Telephone follow-up death time	Time from initial infection to hospitalization	Time of onset	Endpoint time	name	age	sex
0027843375	respiratory circulatory failure	2022-12-17	15	2022-12-18	嵇永发	96	male
0025299882	respiratory circulatory failure	2022-12-22	1	2022-12-23	周延喜	86	male
0102891786	respiratory circulatory failure	2022-12-22	1	2022-12-23	陈有余	87	male
0101577113	respiratory circulatory failure	2022-12-17	1	2022-12-24	丁贵祥	75	male
0028360730	respiratory circulatory failure	2022-12-24	3	2022-12-24	申明余	67	male
0027057060	respiratory circulatory failure	2022-12-25	1	2022-12-26	孙长林	90	male
0101157029	respiratory circulatory failure	2022-12-25	2	2022-12-26	吴四习	86	male
0102905708	respiratory circulatory failure	2022-12-17	1	2022-12-27	朱元康	84	male
0027910762	respiratory circulatory failure	2022-12-24	7	2022-12-27	纪正海	68	male
0026392242	respiratory circulatory failure	2022-12-25	1	2022-12-28	朱德昌	87	male
0101877813	respiratory circulatory failure	2022-12-23	3	2022-12-30	张文成	64	male
0102842998	respiratory circulatory failure	2022-12-28	5	2022-12-30	李红珍	77	female
0102857124	respiratory circulatory failure	2022-12-28	0.6	2022-12-30	卞秀英	84	female
0100267533	respiratory circulatory failure	2022-12-27	10	2022-12-31	韩有华	73	male
0101802749	respiratory circulatory failure	2022-12-24	2	2023-01-01	罗士才	77	male
0102910624	respiratory circulatory failure	2022-12-23	1	2023-01-02	张所长	84	male
0101800710	respiratory circulatory failure	2022-12-28	1	2023-01-02	殷达	85	male
0102550305	respiratory circulatory failure	2023-01-01	8	2023-01-02	何士海	72	male
0100212072	respiratory circulatory failure	2022-12-24	2	2023-01-02	李传金	77	male
0102915475	respiratory circulatory failure	2023-01-02	1	2023-01-02	刘长英	92	female
0102115497	respiratory circulatory failure	2022-12-17	3	2023-01-03	朱华	84	male
0022196731	respiratory circulatory failure	2022-12-20	2	2023-01-04	徐连志	85	male
0101557249	respiratory circulatory failure	2022-12-25	1	2023-01-04	高吉书	90	male
0101298493	respiratory circulatory failure	2023-01-01	4	2023-01-04	张巨金	74	male
0100930726	respiratory circulatory failure	2023-01-01	3	2023-01-04	孙奇	94	male
0100504390	respiratory circulatory failure	2022-12-30	1	2023-01-04	汪永祥	66	male
0101910919	respiratory circulatory failure	2022-12-26	3	2023-01-05	袁国民	79	male
0102914991	respiratory circulatory failure	2023-01-01	7	2023-01-05	洪希曾	92	male
0026275476	respiratory circulatory failure	2022-12-31	7	2023-01-05	王永友	67	male
0025198155	respiratory circulatory failure	2023-01-04	2	2023-01-05	陆梅华	72	female
0026934387	respiratory circulatory failure	2023-01-03	7	2023-01-06	卢尔强	83	male
0102141256	respiratory circulatory failure	2022-12-28	7	2023-01-06	陈艳	59	female
0026119067	respiratory circulatory failure	2022-12-28	4	2023-01-06	马宽安	82	male
0102917961	respiratory circulatory failure	2023-01-05	3	2023-01-06	陈祥雄	86	male
0102914127	respiratory circulatory failure	2022-12-30	3	2023-01-07	王维余	76	male
0026785319	respiratory circulatory failure	2023-01-03	10	2023-01-07	蒋文义	94	male
0101688088	respiratory circulatory failure	2023-01-06	15	2023-01-07	陈志荣	66	male
0102182192	respiratory circulatory failure	2023-01-04	7	2023-01-09	潘长荣	71	male
0028213191	respiratory circulatory failure	2023-01-08	2	2023-01-09	夏高山	80	male
0102911704	respiratory circulatory failure	2022-12-25	4	2023-01-10	褚明茂	90	male
0102739551	respiratory circulatory failure	2022-12-25	2	2023-01-10	钱永贵	75	male
0102491641	respiratory circulatory failure	2022-12-21	2	2023-01-10	孙兴泗	66	male
0025990054	respiratory circulatory failure	2022-12-30	3	2023-01-11	黎宁仁	80	male
0100813686	respiratory circulatory failure	2023-01-05	15	2023-01-11	张林	92	male
0101404024	respiratory circulatory failure	2023-01-10	1	2023-01-11	陈春元	95	male
0102913294	respiratory circulatory failure	2022-12-28	1	2023-01-11	严万珍	76	female
0022184575	respiratory circulatory failure	2023-01-10	7	2023-01-12	李永祥	79	male
0028119494	respiratory circulatory failure	2023-01-09	1	2023-01-12	秦鸿庆	86	male
0101508370	respiratory circulatory failure	2023-01-04	6	2023-01-13	刘正英	85	female
0102916696	respiratory circulatory failure	2023-01-03	10	2023-01-13	刘瑞亭	97	male
0025920739	respiratory circulatory failure	2022-12-29	0.9	2023-01-14	杜德江	86	male
0100141709	respiratory circulatory failure	2023-01-03	3	2023-01-14	姚年榆	87	male
0102156405	respiratory circulatory failure	2022-12-26	2	2023-01-15	顾道春	73	male
0100588067	respiratory circulatory failure	2023-01-04	2	2023-01-15	孔秀珍	82	female
0102920884	respiratory circulatory failure	2023-01-10	15	2023-01-15	宋凤山	89	male
0102922784	respiratory circulatory failure	2023-01-13	4	2023-01-15	朱月亮	89	male
0102915924	respiratory circulatory failure	2023-01-02	7	2023-01-16	王贵田	79	male
0101604806	respiratory circulatory failure	2022-12-30	7	2023-01-17	丁发圣	82	male
0102923439	respiratory circulatory failure	2023-01-14	7	2023-01-18	周兰芳	79	female
0100696881	respiratory circulatory failure	2022-12-30	1	2023-01-20	卜中学	91	male
0024423793	respiratory circulatory failure	2023-01-18	20	2023-01-22	邱正荣	84	male
0102926318	respiratory circulatory failure	2023-01-19	25	2023-01-22	王永太	83	male
0102462412	respiratory circulatory failure	2023-01-02	7	2023-01-23	刘荣生	67	male
0100183331	respiratory circulatory failure	2022-12-31	3	2023-01-26	高国礼	74	male
0026036803	respiratory circulatory failure	2023-01-08	8	2023-01-26	吴建中	83	male
0100924103	respiratory circulatory failure	2022-12-18	1	2023-01-27	刘德荣	78	male
0102919498	respiratory circulatory failure	2023-01-08	8	2023-01-27	郑耀岗	94	male
0028127811	respiratory circulatory failure	2022-12-24	1	2023-01-27	刘先奇	92	male
0028068144	respiratory circulatory failure	2023-01-27	0.6	2023-01-29	蒋春葵	87	male
0101870254	respiratory circulatory failure	2023-01-02	10	2023-01-31	刘春红	60	female
0025292631	respiratory circulatory failure	2023-01-28	28	2023-01-31	戈克义	85	male
0102919175	respiratory circulatory failure	2023-01-29	20	2023-01-31	钟志平	85	female
0102925013	respiratory circulatory failure	2023-01-17	10	2023-02-01	居春许	73	male
0102922708	respiratory circulatory failure	2023-01-13	5	2023-02-02	谢玉胜	74	male
0102910660	respiratory circulatory failure	2022-12-23	3	2023-02-03	房林	51	male
0101417671	respiratory circulatory failure	2023-01-17	20	2023-02-03	李存峰	81	male
0100893185	respiratory circulatory failure	2023-01-22	7	2023-02-03	张世龙	60	male
0102932267	respiratory circulatory failure	2023-01-30	15	2023-02-04	张元宏	90	male
0100958833	respiratory circulatory failure	2022-12-19	14	2023-02-05	周秀英	82	female
0102923055	respiratory circulatory failure	2023-01-13	8	2023-02-06	顾如昌	77	male
0100560080	respiratory circulatory failure	2023-01-17	15	2023-02-06	吴俊一	69	male
0101755874	respiratory circulatory failure	2023-01-06	3	2023-02-10	周林珠	67	female
0028118639	respiratory circulatory failure	2023-01-27	30	2023-02-11	朱小建	51	male
0101601656	respiratory circulatory failure	2022-12-25	2	2023-02-13	王均	95	male
0102917667	respiratory circulatory failure	2023-01-05	5	2023-02-15	刁德东	60	male
0027628630	respiratory circulatory failure	2022-12-20	1	2023-02-18	裴军	82	male
0101532857	respiratory circulatory failure	2023-01-22	1	2023-02-19	吴凤英	87	female
0101578521	respiratory circulatory failure	2023-01-31	1	2023-02-22	郭金荣	90	male
0100498309	respiratory circulatory failure	2023-01-02	5	2023-02-22	武桂兰	73	female
0022700755	respiratory circulatory failure	2023-01-18	15	2023-03-06	宋华强	69	male
0100292965	respiratory circulatory failure	2023-01-14	2	2023-03-08	王学俊	81	male
0102912736	respiratory circulatory failure	2022-12-27	2	2023-03-21	曹进	87	male
0101393574	respiratory circulatory failure	2022-12-22	1	2023-03-23	朱春金	76	male
0102794593	respiratory circulatory failure	2022-12-20	3	2023-04-07	居桂珍	63	female
0100551645	respiratory circulatory failure	2023-01-03	8	2023-04-15	孙珩	93	female
0101868042	respiratory circulatory failure	2023-01-04	7	2023-04-17	费秀英	80	female
0102710152	respiratory circulatory failure	2022-12-25	5	2023-04-29	田改婵	68	female
0102300252	respiratory circulatory failure	2023-01-05	10	2023-05-03	陈友生	81	male
0025879910	respiratory circulatory failure	2023-01-20	3	2023-05-08	薛昆立	56	male
0028251959	respiratory circulatory failure	2022-12-15	5	2023-06-08	陈永贵	60	male
0102921620	respiratory circulatory failure	2023-01-11	8	2023-06-12	易德安	80	male
0102912197	respiratory circulatory failure	2022-12-26	5	2023-06-15	秦俊华	77	male
0026830511	respiratory circulatory failure	2023-01-06	4	2023-06-21	袁玉华	80	male
0100183122	respiratory circulatory failure	2022-12-31	3	2023-07-12	陆文才	88	male
0101481978	respiratory circulatory failure	2022-12-19	1	2023-08-15	许德旺	68	male
0101460287	respiratory circulatory failure	2023-01-14	16	2023-09-12	王彦泽	53	male
0100280672	respiratory circulatory failure	2023-01-05	0.3	2023-09-13	戴光来	60	male
0102909923	respiratory circulatory failure	2022-12-22	3	2023-10-15	张华宝	70	male
0102906379	respiratory circulatory failure	2022-12-18	1	2023-11-10	夏兰珍	71	female
0027957098	respiratory circulatory failure	2023-01-14	2	2023-12-07	高志林	65	male
0101214250	respiratory circulatory failure	2022-12-23	5	2023-12-24	徐存红	71	female
0102920753	respiratory circulatory failure	2023-01-10	2	2024-01-22	王中霞	87	female
0102912177	respiratory circulatory failure	2022-12-26	1	2024-02-14	姚开基	91	male
0100836875	respiratory circulatory failure	2022-12-31	2	2024-04-03	葛兰花	74	female
0100175128	respiratory circulatory failure	2022-12-27	1	2024-05-16	金凤英	74	female
0101490549	respiratory circulatory failure	2023-01-22	1	2024-06-06	陶元山	95	male
0023615877	respiratory circulatory failure	2022-12-30	5	2024-06-16	王锡九	84	male
0101320251	respiratory circulatory failure	2022-12-20	4	2024-06-26	许春香	64	female
0101272120	respiratory circulatory failure	2023-01-12	20	2024-06-27	张成玉	70	male
0102916568	2024-08-02 Traffic accident	2023-01-03	2	2024-08-02	张田庚	81	male
0100424628	Survival	2022-12-17	1	2024-08-21	江新中	69	male
0100014390	Survival	2022-12-18	1	2024-08-21	刘文广	68	male
0027248484	Survival	2022-12-18	2	2024-08-21	杨琦	59	female
0102906623	Survival	2022-12-18	1	2024-08-21	沈学香	71	female
0102793634	Survival	2022-12-19	1	2024-08-21	杨忠元	75	male
0028045589	Survival	2022-12-19	1	2024-08-21	秦有珍	76	female
0102907573	Survival	2022-12-19	3	2024-08-21	仇月霞	52	female
0102907821	Survival	2022-12-20	1	2024-08-21	廖义才	86	male
0102136540	Survival	2022-12-20	1	2024-08-21	徐根友	88	male
0100943438	Survival	2022-12-20	1	2024-08-21	李官禄	88	male
0027644030	Survival	2022-12-20	1	2024-08-21	刘春菊	57	female
0024663650	Survival	2022-12-21	0.6	2024-08-21	池德朝	73	male
0026392053	Survival	2022-12-22	3	2024-08-21	杨春跃	63	male
0102910036	Survival	2022-12-22	5	2024-08-21	王家进	71	male
0023915075	Survival	2022-12-22	1	2024-08-21	朱秀琴	73	female
0102910366	Survival	2022-12-23	1	2024-08-21	朱之兰	72	female
0102566930	Survival	2022-12-23	3	2024-08-21	吉桂英	81	female
0100154682	Survival	2022-12-23	0.6	2024-08-21	兰云	55	female
0102884682	Survival	2022-12-23	5	2024-08-21	帅桂英	77	female
0102910676	Survival	2022-12-23	1	2024-08-21	金加林	51	male
0101222862	Survival	2022-12-23	5	2024-08-21	梁传甲	78	male
0100379177	Survival	2022-12-24	1	2024-08-21	王桂宝	89	male
0022054430	Survival	2022-12-25	10	2024-08-21	陆美霞	86	female
0101837939	Survival	2022-12-25	2	2024-08-21	张启芳	85	male
0102911674	Survival	2022-12-25	3	2024-08-21	苏多枚	69	male
0100167714	Survival	2022-12-27	10	2024-08-21	汤平	73	female
0102912494	Survival	2022-12-27	10	2024-08-21	郑开翔	52	male
0101430792	Survival	2022-12-30	2	2024-08-21	高森才	83	male
0102796339	Survival	2023-01-02	7	2024-08-21	姚明清	84	male
0102194295	Survival	2023-01-02	14	2024-08-21	刘复香	80	female
0025217624	Survival	2023-01-03	4	2024-08-21	董龙扣	70	male
0102917915	Survival	2023-01-05	2	2024-08-21	沈玉高	83	male
0102919079	Survival	2023-01-07	3	2024-08-21	孙孝凤	56	female
0102889957	Survival	2023-01-08	1	2024-08-21	平玉琪	78	female
0100945310	Survival	2023-01-01	7	2024-08-21	殷尚赋	72	male
0100651872	Survival	2023-01-07	1	2024-08-21	李宝林	62	male
0101499716	Survival	2023-01-08	6	2024-08-21	谢立琴	74	female
0102921159	Survival	2023-01-11	3	2024-08-21	徐秀定	71	female
0026761882	Survival	2023-01-12	7	2024-08-21	耿菊云	60	female
0022378331	Survival	2022-12-16	12	2024-08-21	袁诗庆	72	male
0100082493	Survival	2022-12-18	3	2024-08-21	李素英	72	female
0023259641	Survival	2022-12-18	1	2024-08-21	李善仪	86	male
0100781033	Survival	2022-12-24	4	2024-08-21	袁国章	73	male
0027878630	Survival	2022-12-25	1	2024-08-21	焦念玉	78	male
0027924639	Survival	2022-12-26	3	2024-08-21	蒋加安	64	male
0028258853	Survival	2022-12-26	4	2024-08-21	陈义胜	64	male
0022756319	Survival	2022-12-27	5	2024-08-21	朱其华	84	male
0100402592	Survival	2022-12-28	2	2024-08-21	郝粉银	87	female
0027868946	Survival	2022-12-30	3	2024-08-21	董金伦	84	male
0101727657	Survival	2022-12-31	1	2024-08-21	陈淮斌	76	male
0102833771	Survival	2022-12-31	5	2024-08-21	赵玉兰	69	female
0102915858	Survival	2023-01-02	5	2024-08-21	石德谷	75	male
0010023982	Survival	2023-01-10	9	2024-08-21	王广富	79	male
0027872248	Survival	2023-01-05	3	2024-08-21	杨国才	75	male
0100129173	Survival	2023-01-07	15	2024-08-21	祁本龙	71	male
0100491803	Survival	2023-01-08	6	2024-08-21	景有珍	69	female
0026801125	Survival	2023-01-03	2	2024-08-21	夏玉兰	80	female
0100164691	Survival	2023-01-08	30	2024-08-21	费崇英	77	female
0026577604	Survival	2023-01-09	20	2024-08-21	王慧芳	91	female
0101010295	Survival	2023-01-10	2	2024-08-21	林学珍	65	female
0100033357	Survival	2023-01-10	10	2024-08-21	蒋义图	71	male
0100479536	Survival	2023-01-11	10	2024-08-21	姚勤	70	female
0101532848	Survival	2023-01-16	5	2024-08-21	万福华	67	female
0101723065	Survival	2023-01-14	12	2024-08-21	仇凤珍	82	female
0026035945	Survival	2023-01-16	30	2024-08-21	马杰	76	male
0102315100	Survival	2023-01-16	20	2024-08-21	岑文志	83	male
0028020740	Survival	2023-01-19	9	2024-08-21	王玉琴	70	female
0100010009	Survival	2023-01-25	2	2024-08-21	谢红英	78	female
0102931174	Survival	2023-01-28	20	2024-08-21	沈孝海	77	male
0024692610	Survival	2022-12-25	1	2024-08-21	刘昱	64	female
0101430265	Survival	2022-12-17	1	2024-08-21	徐冬林	74	male
0026469917	Survival	2022-12-26	1	2024-08-21	顾一平	85	male
0102913634	Survival	2022-12-29	3	2024-08-21	彭德洲	65	male
0027786109	Survival	2023-01-01	20	2024-08-21	芮永美	66	female
0027620539	Survival	2023-01-02	4	2024-08-21	李慧萍	65	female
0022602861	Survival	2023-01-04	7	2024-08-21	张秀珍	89	female
0102910909	Survival	2022-12-24	7	2024-08-21	华永喜	82	male
0102915639	Survival	2023-01-02	4	2024-08-21	张祥英	90	female
0101977326	Survival	2023-01-08	20	2024-08-21	周敏于	74	male
